# Supplementary material
Source: PubMed Central journal article supplement (PMC5474064)
Supplement: rspb20162799supp2.pdf [file rspb20162799supp2.pdf]

|                     |       |      |                                       |                                        |                                             |   |                      |   |                                 |   |                                     |   |                                                                     |
|---------------------|-------|------|---------------------------------------|----------------------------------------|---------------------------------------------|---|----------------------|---|---------------------------------|---|-------------------------------------|---|---------------------------------------------------------------------|
| <b>Fennoscandia</b> | 0.003 | 4.13 | Lourtier<br>46,043°N - 7,277°E        | <i>Sorbus<br/>aucuparia</i>            | 6<br>h36(6)                                 | 1 | h14(1),h13(1)        | 7 | h02(1),h07(7),h11(5),<br>h19(1) | 7 | h01(1),h03(9),h06(2)<br>)<br>h07(2) | 7 | h01(3),h02(3),<br>h03(1),h07(2),<br>h09(1),h10(2),<br>h12(1),h15(1) |
|                     |       |      | Kleinarl<br>47,24°N - 13,341°E        | <i>P. padus &amp;<br/>S. aucuparia</i> | 3<br>h09(2),h19(1)                          | 3 | h01(1),h02(1),h03(4) | 4 | h07(4)                          | 2 | h03(2),h04(1),h05(1)<br>)           | 3 | h04(3),h05(3)                                                       |
|                     |       |      | Matschertal<br>46,714°N -<br>10,657°E | <i>P. padus &amp;<br/>S. aucuparia</i> | 2<br>h07(1),h09(2)                          | 2 | h03(4)               | 3 | h06(4),h07(2)                   | 2 | h04(1),h05(1+1),h0<br>9(1)          | 3 | h01(1),h04(3),<br>h05(2)                                            |
|                     |       |      | Val Genova<br>46,166°N -<br>10,681°E  | <i>P. padus &amp;<br/>S. aucuparia</i> | 5<br>h09(1),h16(1),h17(1),<br>h18(1),h25(1) | 1 | h09(2)               | 5 | h05(1),h15(1),h16(2),<br>h20(6) | 5 | h08(10)                             | 5 | h04(10)                                                             |
|                     |       |      | Tarvasjoki<br>60,581°N -<br>22,718°E  | <i>Prunus<br/>padus</i>                | 1<br>h05(1)                                 | 1 | h01(2)               | 1 | h07(2)                          | 1 | h03(2)                              | 1 | h01(2)                                                              |
|                     |       |      | Juva<br>61,842°N -<br>27,950°E        | <i>P. padus &amp;<br/>S. aucuparia</i> | 1<br>h05(1)                                 | 1 | h01(2)               | 1 | h07(2)                          | 0 | x<br>h01(4),h03(2),h06(3)<br>)      | 1 | h01(2)<br>h01(10),h02(1),<br>h17(1)                                 |
|                     |       |      | Jaala<br>61,055°N -<br>26,468°E       | <i>P. padus &amp;<br/>S. aucuparia</i> | 7<br>h01(2),h05(4),h06(1)                   | 4 | h01(6),h02(1),h08(1) | 7 | h07(14)                         | 6 | h07(3)                              | 6 |                                                                     |
|                     |       |      | Sirkka<br>67,909°N -<br>24,589°E      | <i>Sorbus<br/>aucuparia</i>            | 1<br>h26(1)                                 | 0 | x                    | 1 | h07(2)                          | 0 | x                                   | 1 | h01(2)                                                              |
|                     |       |      | Raattama<br>68,026°N -<br>24,160°E    | <i>P. padus &amp;<br/>S. aucuparia</i> | 4<br>h13(3),<br>h14(1)                      | 1 | h01(2)               | 4 | h02(1),h07(5),<br>h21(2)        | 3 | h01(4),h06(1),<br>h07(1)            | 5 | h01(10)                                                             |
|                     |       |      | Sinettä<br>66,659°N -<br>25,447°E     | <i>Sorbus<br/>aucuparia</i>            | 1<br>h27(1)                                 | 0 | x                    | 0 | x                               | 0 | x                                   | 1 | h01(1)                                                              |
