# Supplementary material
Source: PubMed Central journal article supplement (PMC5474064)
Supplement: rspb20162799supp4.pdf [file rspb20162799supp4.pdf]

**Tables S3, Supporting information** P-values obtained from the comparison between real and simulated datasets for *Gonioctena intermedia* (1000 simulations per set of parameters and reproduction rate  $t_R = 2^*$ ), generated using spatially-explicit coalescence models.  $f_m$  is the forward migration rate and  $N_e$  is the maximal effective populations sizes. Combined p-values in italic correspond to significant p-values ( $p < 0.05$ ; scenario rejected) and combined p-value in bold represent non-significant p-values (scenario compatible with observed data). \* Results associated with the simulations appear independent of the chosen reproduction rate  $t_R$  with tested values of 2, 5, or 10.

| Scenario | Simulation parameters |                         | Combined p-value | Combined p-value (without COI) | Locus by locus p-values |       |               |       |       |
|----------|-----------------------|-------------------------|------------------|--------------------------------|-------------------------|-------|---------------|-------|-------|
|          | $f_m$                 | $N_e$ (mitoch./nuclear) |                  |                                | COI <sup>a</sup>        | Actin | EF-1 $\alpha$ | RpP0  | WgI   |
| P1       | 0.0001                | 250/1000                | < 0.001          | < 0.001                        | 0.000                   | 0.007 | 0.000         | 0.002 | 0.010 |
| P1       | 0.00001               | 2500/10000              | < 0.001          | < 0.001                        | 0.000                   | 0.001 | 0.000         | 0.000 | 0.015 |
| P1       | 0.0001                | 2500/10000              | < 0.001          | < 0.001                        | 0.000                   | 0.145 | 0.015         | 0.002 | 0.337 |
| P1       | 0.00001               | 25000/100000            | < 0.001          | < 0.001                        | 0.000                   | 0.000 | 0.003         | 0.000 | 0.906 |
| P1       | 0.0001                | 25000/100000            | < 0.001          | < 0.001                        | 0.000                   | 0.040 | 0.057         | 0.002 | 0.034 |
| P2       | 0.0001                | 250/1000                | < 0.001          | < 0.001                        | 0.281                   | 0.015 | 0.004         | 0.008 | 0.014 |
| P2       | 0.00001               | 2500/10000              | < 0.001          | < 0.001                        | 0.173                   | 0.004 | 0.002         | 0.004 | 0.009 |
| P2       | 0.0001                | 2500/10000              | 0.034            | <b>0.061</b>                   | 0.100                   | 0.445 | 0.041         | 0.167 | 0.192 |
| P2       | 0.00001               | 25000/100000            | <b>0.271</b>     | <b>0.736</b>                   | 0.030                   | 0.665 | 0.734         | 0.193 | 0.787 |
| P2       | 0.0001                | 25000/100000            | 0.000            | 0.015                          | 0.000                   | 0.153 | 0.113         | 0.157 | 0.028 |
| P3       | 0.0001                | 250/1000                | < 0.001          | < 0.001                        | 0.000                   | 0.008 | 0.000         | 0.000 | 0.002 |
| P3       | 0.00001               | 2500/10000              | < 0.001          | < 0.001                        | 0.000                   | 0.001 | 0.000         | 0.000 | 0.016 |
| P3       | 0.0001                | 2500/10000              | < 0.001          | < 0.001                        | 0.000                   | 0.060 | 0.000         | 0.003 | 0.154 |
| P3       | 0.00001               | 25000/100000            | < 0.001          | < 0.001                        | 0.000                   | 0.000 | 0.000         | 0.000 | 0.443 |
| P3       | 0.0001                | 25000/100000            | < 0.001          | < 0.001                        | 0.000                   | 0.001 | 0.001         | 0.000 | 0.041 |
| P4       | 0.0001                | 250/1000                | < 0.001          | < 0.001                        | 0.000                   | 0.004 | 0.000         | 0.000 | 0.003 |
| P4       | 0.00001               | 2500/10000              | < 0.001          | < 0.001                        | 0.000                   | 0.001 | 0.000         | 0.001 | 0.004 |
| P4       | 0.0001                | 2500/10000              | < 0.001          | < 0.001                        | 0.000                   | 0.023 | 0.000         | 0.000 | 0.204 |
| P4       | 0.00001               | 25000/100000            | < 0.001          | < 0.001                        | 0.000                   | 0.001 | 0.000         | 0.000 | 0.637 |
| P4       | 0.0001                | 25000/100000            | < 0.001          | < 0.001                        | 0.000                   | 0.001 | 0.000         | 0.000 | 0.904 |
| P5       | 0.0001                | 250/1000                | < 0.001          | < 0.001                        | 0.008                   | 0.002 | 0.001         | 0.001 | 0.002 |
| P5       | 0.00001               | 2500/10000              | < 0.001          | < 0.001                        | 0.009                   | 0.004 | 0.002         | 0.000 | 0.001 |
| P5       | 0.0001                | 2500/10000              | < 0.001          | < 0.001                        | 0.005                   | 0.100 | 0.003         | 0.020 | 0.006 |
| P5       | 0.00001               | 25000/100000            | < 0.001          | < 0.001                        | 0.005                   | 0.246 | 0.017         | 0.002 | 0.090 |
| P5       | 0.0001                | 25000/100000            | 0.004            | <b>0.060</b>                   | 0.004                   | 0.921 | 0.141         | 0.015 | 0.289 |
| P6       | 0.0001                | 250/1000                | < 0.001          | < 0.001                        | 0.000                   | 0.001 | 0.000         | 0.001 | 0.000 |
| P6       | 0.00001               | 2500/10000              | < 0.001          | < 0.001                        | 0.000                   | 0.002 | 0.000         | 0.000 | 0.000 |
| P6       | 0.0001                | 2500/10000              | < 0.001          | < 0.001                        | 0.000                   | 0.025 | 0.000         | 0.000 | 0.007 |
| P6       | 0.00001               | 25000/100000            | < 0.001          | < 0.001                        | 0.000                   | 0.001 | 0.000         | 0.000 | 0.066 |
| P6       | 0.0001                | 25000/100000            | < 0.001          | < 0.001                        | 0.000                   | 0.001 | 0.000         | 0.000 | 0.234 |
| P7       | 0.0001                | 250/1000                | < 0.001          | < 0.001                        | 0.000                   | 0.016 | 0.001         | 0.001 | 0.019 |
| P7       | 0.00001               | 2500/10000              | < 0.001          | < 0.001                        | 0.000                   | 0.003 | 0.000         | 0.000 | 0.005 |
| P7       | 0.0001                | 2500/10000              | < 0.001          | < 0.001                        | 0.000                   | 0.047 | 0.003         | 0.003 | 0.400 |
| P7       | 0.00001               | 25000/100000            | < 0.001          | < 0.001                        | 0.001                   | 0.005 | 0.003         | 0.000 | 0.841 |
| P7       | 0.0001                | 25000/100000            | < 0.001          | < 0.001                        | 0.002                   | 0.061 | 0.027         | 0.006 | 0.047 |
| P8       | 0.0001                | 250/1000                | < 0.001          | < 0.001                        | 0.310                   | 0.013 | 0.004         | 0.004 | 0.011 |
| P8       | 0.00001               | 2500/10000              | < 0.001          | < 0.001                        | 0.142                   | 0.006 | 0.004         | 0.003 | 0.007 |
| P8       | 0.0001                | 2500/10000              | <b>0.056</b>     | <b>0.098</b>                   | 0.107                   | 0.487 | 0.062         | 0.161 | 0.248 |
| P8       | 0.00001               | 25000/100000            | <b>0.251</b>     | <b>0.768</b>                   | 0.022                   | 0.787 | 0.769         | 0.196 | 0.726 |
| P8       | 0.0001                | 25000/100000            | 0.000            | 0.016                          | 0.000                   | 0.191 | 0.138         | 0.108 | 0.028 |
| P9       | 0.0001                | 250/1000                | < 0.001          | < 0.001                        | 0.000                   | 0.009 | 0.000         | 0.002 | 0.006 |
| P9       | 0.00001               | 2500/10000              | < 0.001          | < 0.001                        | 0.000                   | 0.002 | 0.000         | 0.000 | 0.009 |
| P9       | 0.0001                | 2500/10000              | < 0.001          | < 0.001                        | 0.000                   | 0.036 | 0.001         | 0.001 | 0.159 |
| P9       | 0.00001               | 25000/100000            | < 0.001          | < 0.001                        | 0.000                   | 0.000 | 0.000         | 0.000 | 0.456 |
| P9       | 0.0001                | 25000/100000            | < 0.001          | < 0.001                        | 0.000                   | 0.003 | 0.001         | 0.000 | 0.038 |
| P10      | 0.0001                | 250/1000                | < 0.001          | < 0.001                        | 0.000                   | 0.002 | 0.000         | 0.000 | 0.005 |
| P10      | 0.00001               | 2500/10000              | < 0.001          | < 0.001                        | 0.000                   | 0.001 | 0.000         | 0.000 | 0.003 |
| P10      | 0.0001                | 2500/10000              | < 0.001          | < 0.001                        | 0.000                   | 0.015 | 0.000         | 0.000 | 0.246 |
| P10      | 0.00001               | 25000/100000            | < 0.001          | < 0.001                        | 0.000                   | 0.001 | 0.000         | 0.000 | 0.592 |
| P10      | 0.0001                | 25000/100000            | < 0.001          | < 0.001                        | 0.000                   | 0.000 | 0.000         | 0.000 | 0.958 |
| P11      | 0.0001                | 250/1000                | < 0.001          | < 0.001                        | 0.012                   | 0.003 | 0.001         | 0.002 | 0.003 |
| P11      | 0.00001               | 2500/10000              | < 0.001          | < 0.001                        | 0.035                   | 0.001 | 0.001         | 0.001 | 0.003 |
| P11      | 0.0001                | 2500/10000              | 0.000            | 0.005                          | 0.015                   | 0.170 | 0.005         | 0.024 | 0.022 |
| P11      | 0.00001               | 25000/100000            | < 0.001          | < 0.001                        | 0.021                   | 0.021 | 0.014         | 0.000 | 0.124 |
| P11      | 0.0001                | 25000/100000            | 0.007            | <b>0.349</b>                   | 0.001                   | 0.980 | 0.478         | 0.028 | 0.430 |
| P12      | 0.0001                | 250/1000                | < 0.001          | < 0.001                        | 0.000                   | 0.001 | 0.000         | 0.000 | 0.001 |
| P12      | 0.00001               | 2500/10000              | < 0.001          | < 0.001                        | 0.000                   | 0.002 | 0.000         | 0.000 | 0.003 |
| P12      | 0.0001                | 2500/10000              | < 0.001          | < 0.001                        | 0.000                   | 0.040 | 0.000         | 0.001 | 0.016 |
| P12      | 0.00001               | 25000/100000            | < 0.001          | < 0.001                        | 0.000                   | 0.002 | 0.000         | 0.000 | 0.124 |
