# Supplementary material
Source: PubMed Central journal article supplement (PMC5474064)
Supplement: rspb20162799supp5.pdf [file rspb20162799supp5.pdf]

|                                     | 1.563                           | 1.563                            | 1.563                            | 1.563                            | 1.563                            | 1.563                            | 1.563                             | 1.563                            | 1.563                            | 1.563                             | 1.563                             | 1.563                            | 1.563                            |
|-------------------------------------|---------------------------------|----------------------------------|----------------------------------|----------------------------------|----------------------------------|----------------------------------|-----------------------------------|----------------------------------|----------------------------------|-----------------------------------|-----------------------------------|----------------------------------|----------------------------------|
| ThetaN mode<br>(posterior<br>HDI95) | 1.14782<br>(0.35206-<br>1.5604) | 1.35541<br>(0.66485-<br>1.55608) | 1.14782<br>(0.31379-<br>1.55608) | 1.35541<br>(0.36483-<br>1.55608) | 1,07862<br>(0.29670-<br>1.54623) | 1,12014<br>(0.29670-<br>1.54713) | 0,995586<br>(0.29670-<br>1.54731) | 1,47996<br>(0.40623-<br>1.55608) | 1,46612<br>(0.33560-<br>1.55608) | 0.303617<br>(0.19982-<br>1.45418) | 0.954067<br>(0.27262<br>7-1.5284) | 1.47996<br>(0.37571-<br>1.55608) | 1.30005<br>(0.36165-<br>1.55608) |

all times are given in numbers of years/generations,

\* : this model needed to add a time for migration to stop - prior was 20-130 000 and posterior with a mode = 28888.9 (HDI95=21667-12311),

**migration matrice 0** allows no migration; **migration matrice 1** allows migration between Alps-Carpathians and Carpathians-North;

**migration matrice 2** allows migration between Alps-Carpathians, Carpathians-North and North-Alps; **migration matrice 3** allows migration between Alps-Carpathians and North-Alps; **migration matrice 4** allows migration between Alps-Carpathians; **migration matrice 5** allows migration between Alps-North and Carpathians-North

**TDecN**: Time of northern population size decrease, **TDecCarp**: Time of Carpathian population size decrease, **TExpN**: time of northern population growth, **TExpCarp**: time of Carpathian population growth,

**TDivOE**: Divergence time of population from the Alps and the Carpathians,

**TDivNS**: Divergence time of population from the North and the Carpathians,

**Tmigr** : timing of gene flow following the migration matrix given for each scenario,

**gmigr**: intensity of gene flow when existing,

**ThetaA, ThetaC, ThetaN**: nucleotide diversity given for the COI marker in the Alpine, the Carpathian and the northern populations, respectively.
